# Supplementary material for: A non-traditional biomass-derived N, P, and S ternary self-doped 3D multichannel carbon ORR electrocatalyst
Source: Royal Society of Chemistry journal article supplement (doi:10.1039/d0nj03283b), 2020-01-01
Supplement: d0nj03283b1.pdf [file d0nj03283b1.pdf]

## New Journal of Chemistry

### Electronic supplementary information

# A non-traditional biomass-derived N-, P- and S- ternary self-doped 3D multichannel carbon ORR electrocatalyst

Nai-bao Huang <sup>1\*</sup>, Jun-jie Zhang <sup>1</sup>, Yin Sun <sup>1</sup>, Xian-nian Sun <sup>1</sup>, Zhong-yu Qiu <sup>1</sup> and Xiao-wen Ge <sup>1</sup>

<sup>1</sup> College of Transportation Engineering, Dalian Maritime University, Dalian, 116026, China.

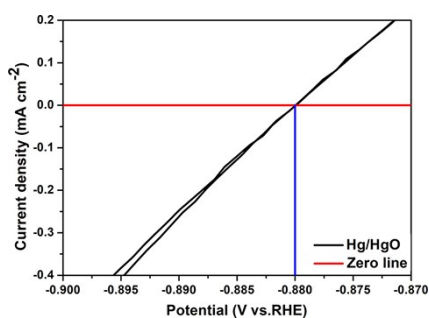

Figure S1. Hg/HgO reference electrode was 0.88 V versus RHE at a scan rate of 1 mV s<sup>-1</sup>.

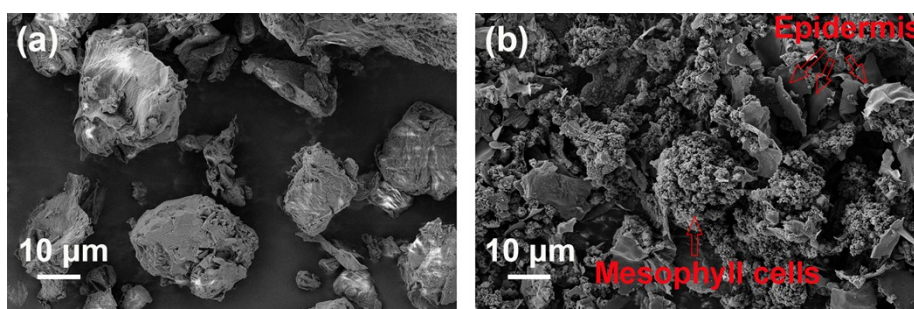

Figure S2 (a, b) SEM images of NS-850 and S-850.
